# Supplementary material for: An innovative nucleation method for high and rapid hydrogen storage based on clathrate hydrates
Source: Royal Society of Chemistry journal article supplement (doi:10.1039/d4ta00850b), 2024-01-01
Supplement: d4ta00850b1.pdf [file d4ta00850b1.pdf]

## SUPPORTING INFORMATION

### **An innovative nucleation method for high and rapid hydrogen storage based on clathrate hydrates**

Siyuan Chen<sup>a</sup>, Yanhong Wang<sup>a, c \*</sup>, Shuanshi Fan<sup>a</sup>, Xuemei Lang<sup>a, b</sup>, Gang Li<sup>a</sup>

*(<sup>a</sup> School of Chemistry and Chemical Engineering, South China University of Technology, Guangzhou, 510640, China; <sup>b</sup> Key Laboratory of Fuel Cell Technology of Guangdong Province, Guangzhou, 510640, China; <sup>c</sup> Key Lab of Enhanced Heat Transfer and Energy Conservation, Ministry Education, Guangzhou, 510640, China)*

**\*Corresponding author**

**E-mail address:** [wyh@scut.edu.cn](mailto:wyh@scut.edu.cn)

Fig. S1 given below shows the pressure and temperature evolution along with the hydrogen uptake and instantaneous hydrogen uptake rate using the q-SF method under the experimental conditions of 274.15 K and 8.3 MPa.

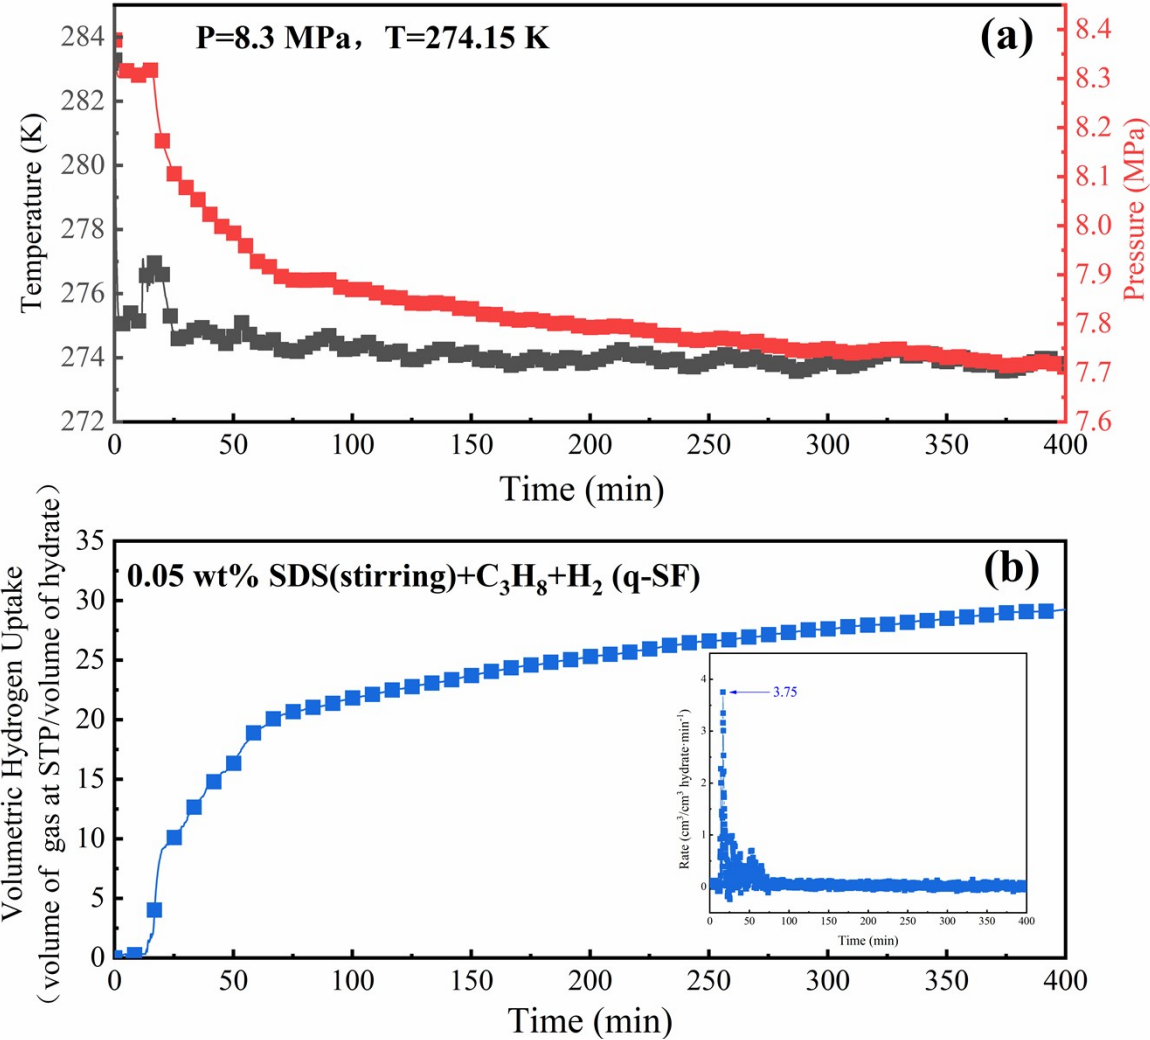

Fig. S1- Promoting effect of quasi-simultaneous formation on propane-hydrogen hydrates under mild conditions (a) temperature and pressure changes, (b) gas storage capacity and gas storage rate

(C<sub>SDS</sub> =0.05wt%, P = 8.3 MPa, T = 274.15 K).

Fig.S2 given below shows the variation of temperature and pressure over time with different SDS concentrations under the same initial experimental conditions of 18.2 MPa and 274.15 K.

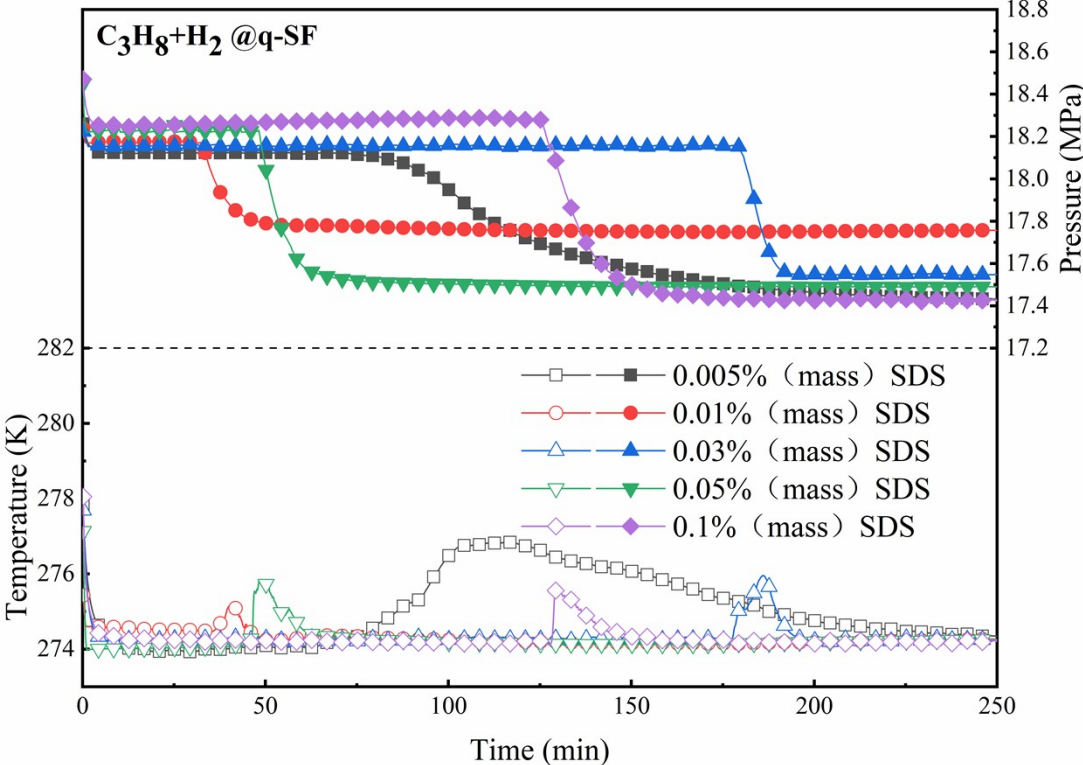

Fig. S2- The curve of pressure and temperature of propane-hydrogen hydrates quasi-simultaneous formation with different SDS concentrations (274.15 K and initial pressure of 18.2 MPa)
